# Supplementary material for: Benzalkonium Chloride and Benzethonium Chloride Effectively Reduce Spore Germination of Ginger Soft Rot Pathogens: Fusarium solani and Fusarium oxysporum
Source: MDPI journal article supplement (doi:10.3390/jof10010008), 2023-12-22
Supplement: s1 [file s1]

# Supporting Information

## Benzalkonium Chloride and Benzethonium Chloride Effectively Reduce Spore Germination of Ginger Soft Rot Pathogens: *Fusarium solani* and *Fusarium oxysporum*

Dongxu Zhao <sup>1</sup>, Yang Zhang <sup>1</sup>, Zhaoyang Jin <sup>1</sup>, Ruxiao Bai <sup>2</sup>, Jun Wang <sup>2</sup>, Li Wu <sup>1,3,\*</sup> and Yujian He <sup>1,2,4,\*</sup>

<sup>1</sup> School of Chemical Sciences, University of Chinese Academy of Sciences, Beijing 100049, China

<sup>2</sup> Institute of Farmland Water Conservancy and Soil Fertilizers, Xinjiang Academy of Agricultural Reclamation Sciences, Shihezi 832000, China

<sup>3</sup> State Key Laboratory of Natural and Biomimetic Drugs, School of Pharmaceutical Sciences, Peking University, Beijing 100191, China

<sup>4</sup> School of Future Technology, University of Chinese Academy of Sciences, Beijing 100049, China

\* Correspondence: wuli@ucas.ac.cn (L.W.); heyujian@ucas.ac.cn (Y.H.)

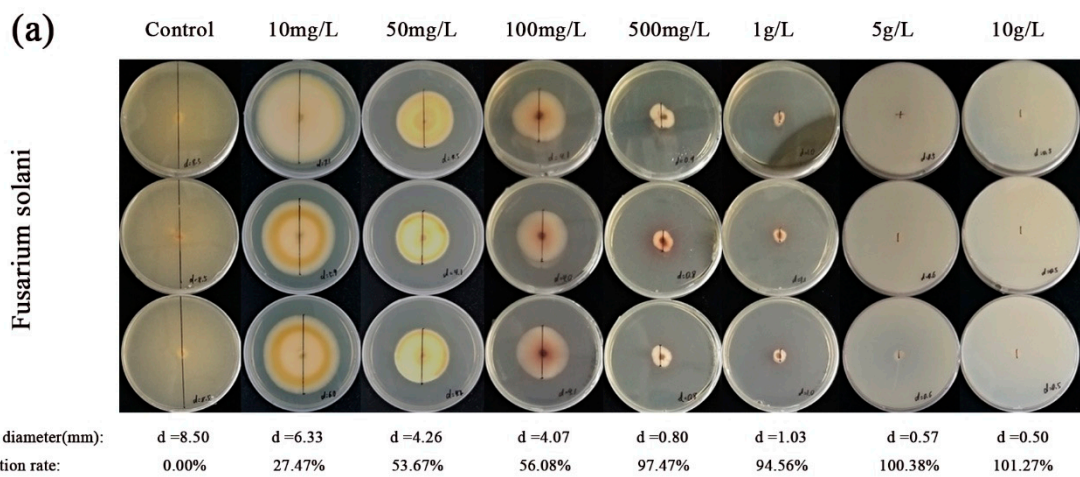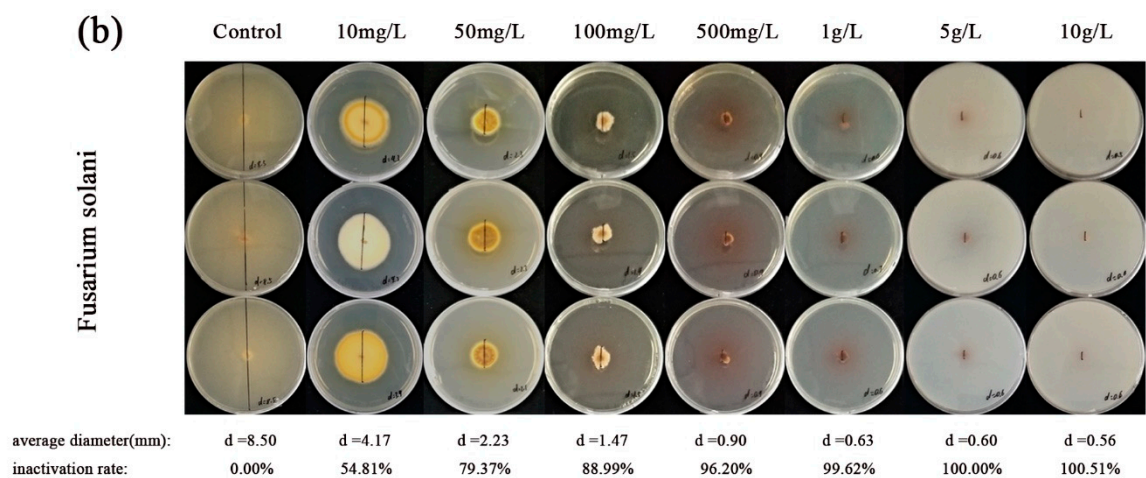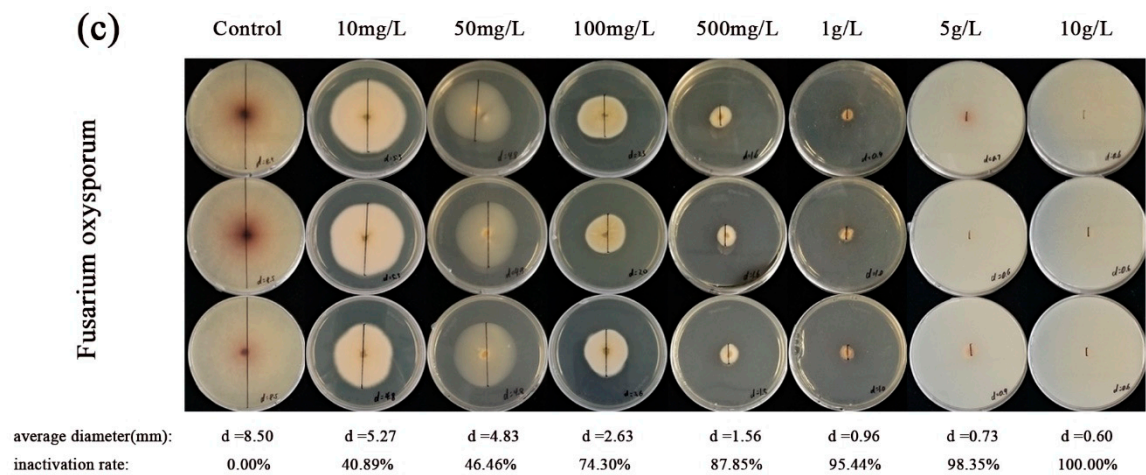

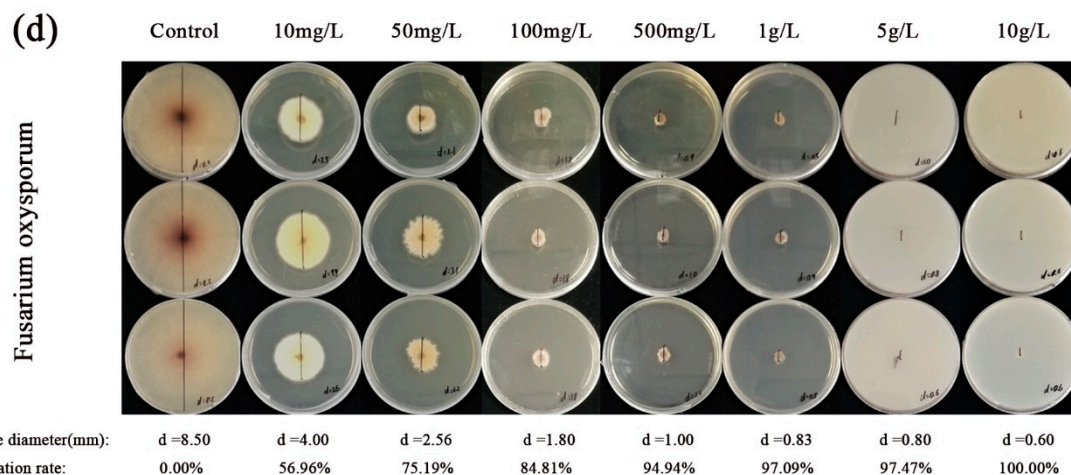

**Figure S1.** Comparison of mycelial growth of the two fungi after 7 days of incubation on fungicide-containing plates (Corresponds to the bar chart in Figure 4). (a) *Fusarium solani* mycelium after BAC treatment; (b) *Fusarium solani* after BEC treatment; (c) *Fusarium oxysporum* mycelium after BAC treatment; (d) *Fusarium oxysporum* mycelium after BEC treatment. Experimental conditions: [BAC] = [BEC] = 10, 50, 100, 500, 1000, 5000 mg/L; initial concentration of fungal spores =  $10^6$  CFU/mL; pH = 7.40; T =  $28 \pm 1$  °C.

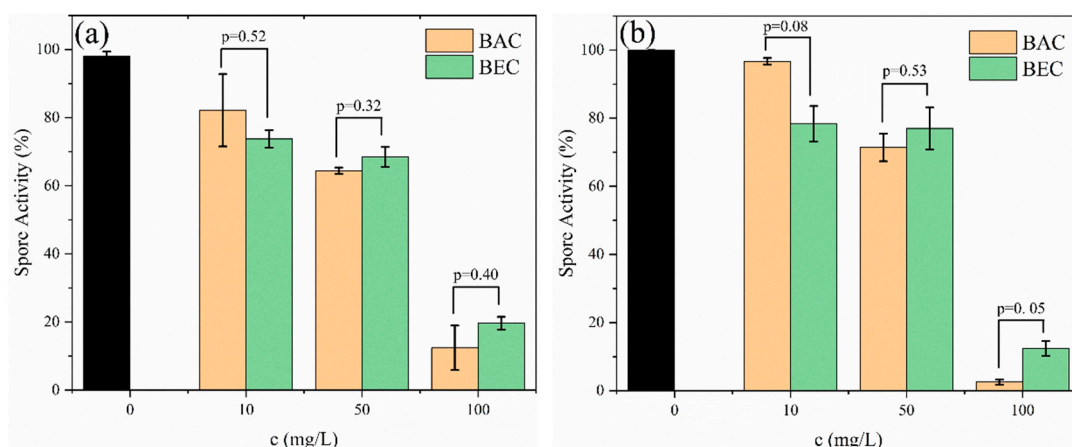

**Figure S2.** Laser confocal microscopy to observe changes in spore viability. Expressed as the ratio of red fluorescence intensity to total fluorescence intensity. (a) *Fusarium solani* spores and (b) *Fusarium oxysporum* spores. Experimental conditions: initial concentration of fungal spores =  $10^6$  CFU/mL; pH = 7.40; T =  $28 \pm 1$  °C.

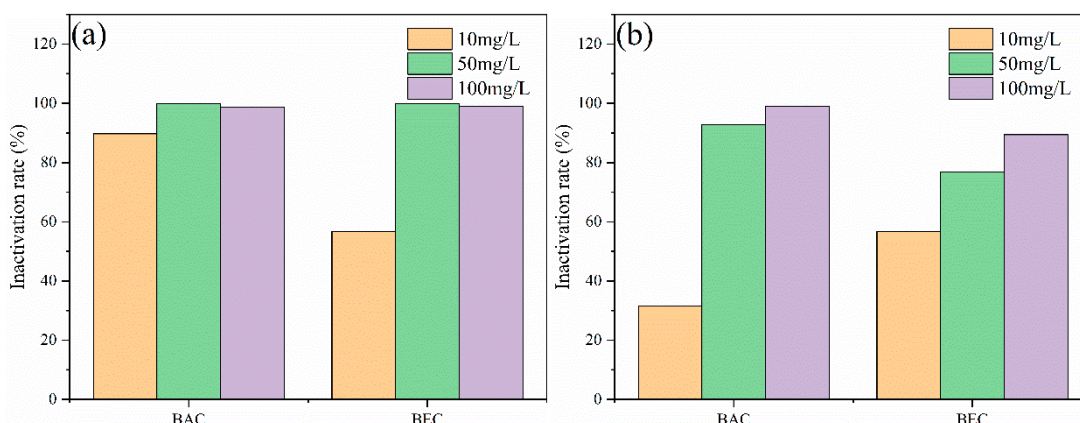

**Figure S3.** Results of flow cytometric analysis of inactivation of *Fusarium solani* spores (a) and *Fusarium oxysporum* spores (b) by BAC and BEC. Experimental conditions: [BAC] = [BEC] = 10, 50, 100 mg/L; initial concentration of fungal spores =  $10^6$  CFU/mL; pH = 7.40; T =  $28 \pm 1$  °C.



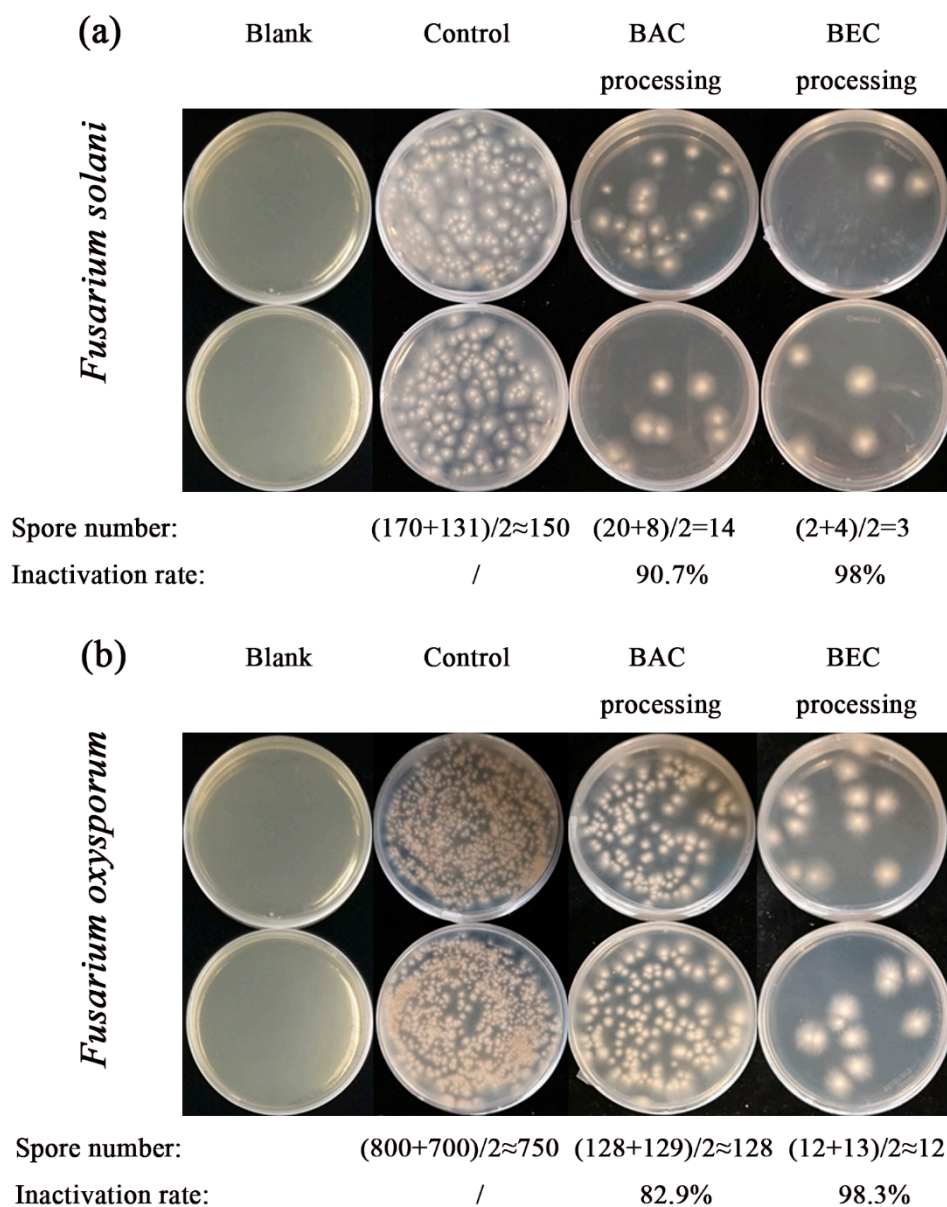

**Figure S4.** Effect of BAC and BEC on the inactivation of *Fusarium solani* spores (a) and *Fusarium oxysporum* spores (b) in sterilized soil samples. Experimental conditions: [BAC] = [BEC] = 100mg/L; initial concentration of fungal spores =  $10^6$  CFU/mL; pH = 7.40; T =  $28 \pm 1$  °C; reaction time= 30 min.
